# Supplementary material for: Fabrication of a β-cyclodextrin-based self-assembly containing a redox-responsive ferrocene
Source: Royal Society of Chemistry journal article supplement (doi:10.1039/c9sm02049g), 2019-11-14
Supplement: c9sm02049g1.pdf [file c9sm02049g1.pdf]

Supporting information for:

**Fabrication of a  $\beta$ -cyclodextrin-based self-assembly containing a redox-responsive ferrocene**

Bing Jiang,<sup>a</sup> Huichuang Guo,<sup>a</sup> Li Zhao,<sup>\*a</sup> Baocai Xu,<sup>a</sup> Ce Wang,<sup>a</sup> Changyao Liu<sup>a</sup> and Haiming Fan<sup>\*b</sup>

<sup>a</sup> School of Light Industry Science and Technology, Beijing Technology and Business University, Beijing 100048, P. R. China. E-mail address: zhaol@btbu.edu.cn (L. Zhao)

<sup>b</sup> College of Petroleum Engineering, China University of Petroleum (East China), Qingdao 266555, P. R. China. E-mail address: HaimingFan@gmail.com (H. Fan)

**Synthesis of  $\beta$ CD-EG-Fc**

$\beta$ CD-EG-Fc was designed and synthesized as demonstrated in Scheme S1. Compound **1** was synthesized by the following procedure: ferrocenecarboxylic acid (2.06 g, 8.95 mmol) was dispersed in  $\text{CH}_2\text{Cl}_2$  (100 mL), and then oxalyl chloride (2.3 mL, 26.9 mmol) was added slowly. The mixture was stirred at room temperature for 3 h resulting in a dark red solution. The solution was evaporated under vacuum giving a red oil (chlorocarbonyl ferrocene). The red oil was dissolved in THF (100 mL) and added dropwise into a solution of triethylene glycol (8.75 g, 45 mmol), DMAP (0.12 g, 1 mmol), TEA (6.24 mL, 44.7 mmol) and THF (400 mL) at 0 °C under  $\text{N}_2$ . The mixture was then stirred at room temperature overnight. After the reaction was completed, the solvent was evaporated under vacuum giving an oil, which was purified by column chromatography (eluent: ethyl acetate/petroleum ether, v/v=1/3) giving compound **1** as a red oil.  $^1\text{H}$  NMR ( $\text{DMSO}-d_6$ ):  $\delta$  (ppm): 4.75, 4.49, 4.29, 4.25 (m, 9H, protons of the cyclopentadienyl ring), 4.56 (t, 2H,  $\text{Fc-COO-CH}_2\text{-CH}_2\text{-}$ ), 3.70, 3.61-3.47, 3.40 (m, 14H,  $-(\text{CH}_2\text{OCH}_2)_3\text{CH}_2\text{-OH}$ ); MS (ESI): calc. for  $\text{C}_{19}\text{H}_{26}\text{FeO}_5$  ( $[\text{M}]^+$ ): 406.11; found: 406.9 ( $[\text{M}+\text{H}]^+$ ).

Compound **2** was synthesized according to the literature procedure.<sup>32</sup>  $^1\text{H}$  NMR ( $\text{DMSO}-d_6$ ):  $\delta$  (ppm): 4.76, 4.50, 4.23 (m, 9H, protons of the cyclopentadienyl ring), 4.29 (t, 2H,  $\text{Fc-COO-CH}_2\text{-}$ ); 4.00 (s, 2H,  $-\text{OCH}_2\text{COOH}$ ); 3.45-3.70 (m, 14H,  $-(\text{CH}_2\text{OCH}_2)_3\text{CH}_2\text{-O-}$ ). Compound **3** was synthesized in accordance with our previous report.<sup>33</sup>  $^1\text{H}$  NMR ( $\text{D}_2\text{O}$ ):  $\delta$  (ppm): 5.07(s, 7H, H1 of CD), 4.02-3.53 (m, 40H, H2-6 of CD),

3.07-2.83 (t, 6H,  $-\text{CH}_2\text{-NH-CH}_2\text{-CH}_2\text{-NH}_2$ ).

Compound **2** (0.1 g, 0.22 mmol) was dissolved in  $\text{CH}_2\text{Cl}_2$  (100 mL), and oxalyl chloride (0.057 mL, 0.67 mmol) was added slowly. The mixture solution was stirred for 3 h at room temperature. After the reaction was completed, the solvent was removed by vacuum distillation giving a brown solid. This was dissolved in DMF (50 mL), which was added slowly to a solution of compound **3** (0.2435 g, 0.207 mmol), TEA (0.288 mL) and DMF (100 mL) at 0 °C. The light yellow solution was stirred at room temperature overnight. The resultant solution was poured into cold acetone and placed in the refrigerator overnight resulting in a brown precipitate. The brown solid was collected and dried in a vacuum oven, furnishing the pure product,  $\beta\text{CD-EG-Fc}$ .  $^1\text{H}$  NMR ( $\text{D}_2\text{O}$ ):  $\delta$  (ppm): 5.32 (d, 9H, protons of the cyclopentadienyl ring); 5.01 (s, 7H, H1 of CD), 4.31 (t, 4H,  $-\text{NH-CO-CH}_2\text{-O-}$ ,  $\text{Fc-COOCH}_2\text{-}$ ), 3.90-3.28 (m, 56H,  $-\text{CH}_2\text{-NH-CO-}$ ,  $-(\text{OCH}_2\text{CH}_2)_3\text{CH}_2\text{-O-}$  and H2-6 of CD), 2.79, 2.93 (t, 4H,  $-\text{CH}_2\text{-NH-CH}_2\text{-}$ ); MS (MALDI-TOF): calc. for  $\text{C}_{65}\text{H}_{102}\text{FeN}_2\text{O}_{41}$  ( $[\text{M}]^+$ ): 1622.53; found: 1645.52 ( $[\text{M}+\text{Na}]^+$ ), 1623.54 ( $[\text{M}+\text{H}]^+$ ).

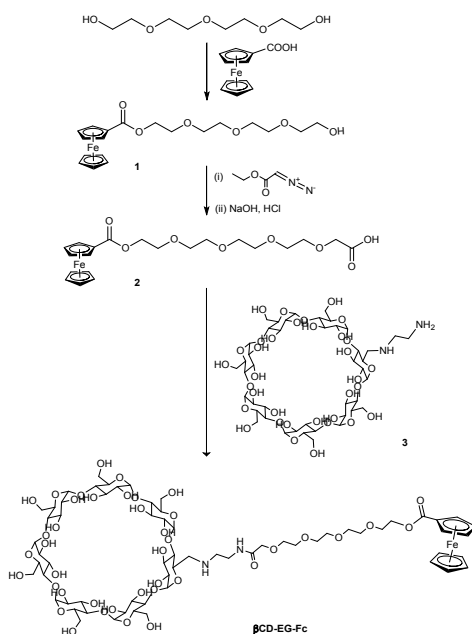

**Scheme S1** Synthesis of  $\beta\text{CD-EG-Fc}$ .

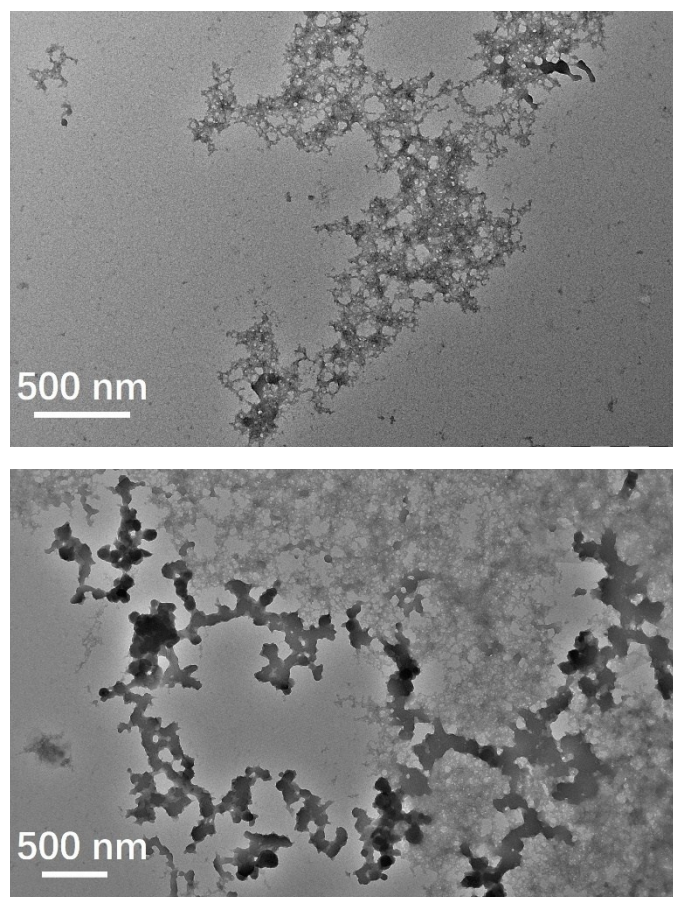

Fig. S1 TEM images of  $\beta$ CD-EG-Fc<sup>+</sup> solution after the addition of GSH.

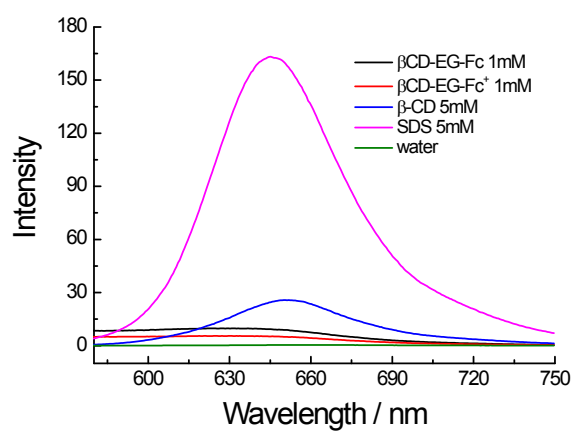

Fig. S2 Fluorescence spectra of Nile red solution,  $\beta$ CD-EG-Fc/ $\beta$ CD-EG-Fc<sup>+</sup> solution (1mM),  $\beta$ -CD solution (5mM), and SDS solution (5mM).
